# Supplementary material for: Toward white electroluminescence by ruthenium quinoxaline light emitting diodes
Source: Royal Society of Chemistry journal article supplement (doi:10.1039/c4nj01938e), 2015-01-01
Supplement: c4nj01938e1.pdf [file c4nj01938e1.pdf]

## Supplementary Information for

# Toward white electroluminescence by ruthenium quinoxaline light emitting diodes

Hashem Shahroosvand <sup>a\*</sup>, Shiva Rezaei <sup>a</sup>, Ezeddin Mohajerani <sup>b</sup>, Malek Mahmoudi <sup>b</sup>

<sup>a</sup>Chemistry Department, University of Zanjan, Zanjan, Iran.

<sup>b</sup>Laser and Plasma Research Institute, Shahid Beheshti University, Tehran, Iran

### Content:

**S1.** The wavelength of electroluminescence (EL) and photoluminescence (PL) emissions of ruthenium polypyridyl complexes

**S2.** Absorption and emission properties of Ru quinoxaline derivatives

**S3a.** <sup>1</sup>H-NMR spectrum of aromatic region of [Ru(dicnq)(pyTz)(phen)]BF<sub>4</sub> dissolved in DMSO solvent at room temperature

**S3b.** <sup>1</sup>H-NMR spectrum of aromatic region of [Ru(dicnq)(pyTz)(bpy)]BF<sub>4</sub> dissolved in DMSO solvent at room temperature

**S3c.** <sup>1</sup>H-NMR spectrum of aromatic region of [Ru(dicnq)(pyTz)<sub>2</sub>] dissolved in DMSO solvent at room temperature

**S4a.** FTIR spectrum of dicnq ligand with KBr disc

**S4b.** FTIR spectrum of pyTz ligand with KBr disc

**S4c.** FTIR spectrum of [Ru(dicnq)(pyTz)(bpy)]BF<sub>4</sub> with KBr disc

**S4d.** FTIR spectrum of [Ru(dicnq)(pyTz)<sub>2</sub>] with KBr disc

**S5.** Cyclic voltammograms of Ru(dicnq) complexes (1-3) in MeCN solution containing 0.1 M tetra-n-butyl ammonium tetrafluoroborate at room temperature

**S6a.** The optimized structures of [Ru(dicnq)(pyTz)(phen)]BF<sub>4</sub> and diagram of the three highest occupied and three lowest unoccupied molecular orbital levels of [Ru(dicnq)(pyTz)(phen)]BF<sub>4</sub> by DFT calculation

**S6b.** The optimized structures of [Ru(dicnq)(pyTz)(bpy)]BF<sub>4</sub> and diagram of the three highest occupied and three lowest unoccupied molecular orbital levels of [Ru(dicnq)(pyTz)(bpy)]BF<sub>4</sub> by DFT calculation

**S6c.** The optimized structures of [Ru(dicnq)(pyTz)<sub>2</sub>] and diagram of the three highest occupied and three lowest unoccupied molecular orbital levels of [Ru(dicnq)(pyTz)<sub>2</sub>] by DFT calculation

**S7.** PL spectrum of PVK/Ru(dicnq) film ( $\lambda_{exc}=405$  nm)

**S1:**

The wavelength of electroluminescence (EL) and photoluminescence (PL) emissions of ruthenium polypyridyl complexes.

| Complex/reactant                                                                   | $\lambda_{em}$<br>(nm) | $\lambda_{el}$<br>(nm) | ref   |
|------------------------------------------------------------------------------------|------------------------|------------------------|-------|
| Ru(bpy) <sub>3</sub> <sup>2+</sup>                                                 | 608                    | 608                    | 1,2,3 |
| Ru(bpy) <sub>3</sub> <sup>2+</sup> /C <sub>2</sub> O <sub>4</sub> <sup>2-</sup>    | 610                    | 610                    | 4     |
| Ru(bpy) <sub>3</sub> <sup>2+</sup> /C <sub>2</sub> O <sub>4</sub> <sup>2-</sup>    |                        | 591                    | 5     |
| Ru(bpy) <sub>3</sub> <sup>2+</sup> /S <sub>2</sub> O <sub>8</sub> <sup>2-</sup>    | 625                    | 625                    | 4,6   |
| Ru(bpy) <sub>3</sub> <sup>2+</sup> /TPrA                                           | 610                    | 610                    | 7     |
| Ru(dmbp) <sub>3</sub> <sup>2+</sup> /C <sub>2</sub> O <sub>4</sub> <sup>2-</sup>   |                        | 594                    | 5     |
| Ru(phen) <sub>3</sub> <sup>2+</sup>                                                | 590                    | 590                    | 8     |
| Ru(phen) <sub>3</sub> <sup>2+</sup> /C <sub>2</sub> O <sub>4</sub> <sup>2-</sup>   |                        | 585                    | 5     |
| Ru(dmphen) <sub>3</sub> <sup>2+</sup> /C <sub>2</sub> O <sub>4</sub> <sup>2-</sup> |                        | 591                    | 5     |
| Ru(terpy) <sub>3</sub> <sup>2+</sup>                                               |                        | 660                    | 8     |
| Ru(bpz) <sub>3</sub> <sup>2+</sup>                                                 | 585                    | 585                    | 9,10  |
| Ru(bpz) <sub>3</sub> <sup>2+</sup> /S <sub>2</sub> O <sub>8</sub> <sup>2-</sup>    | 585                    | 590                    | 11    |

|                                                                              |     |     |    |
|------------------------------------------------------------------------------|-----|-----|----|
| $\text{Ru}(\text{dp-bpy})_3^{2+}$                                            | 635 | 635 | 12 |
| $\text{Ru}(\text{dp-phen})_3^{2+}$                                           | 615 | 615 | 12 |
| $(\text{bpy})_2\text{Ru}(\text{bphb})^{2+}$                                  | 624 | 624 | 13 |
| $(\text{bpy})_2\text{Ru}(\text{bphb})^{2+} / \text{TPrA}$                    | 624 | 624 | 13 |
| $(\text{bpy})_2\text{Ru}(\text{bphb})^{2+} / \text{S}_2 \text{O}_8^{2-}$     | 624 | 624 | 13 |
| $[(\text{bpy})_2\text{Ru}]_2(\text{bphb})^{4+}$                              | 624 | 624 | 13 |
| $[(\text{bpy})_2\text{Ru}]_2(\text{bphb})^{4+} / \text{TPrA}$                | 624 | 624 | 13 |
| $[(\text{bpy})_2\text{Ru}]_2(\text{bphb})^{4+} / \text{S}_2 \text{O}_8^{2-}$ | 624 | 624 | 13 |
| $(\text{bpy})_2\text{Ru}(\text{AZA-bpy})^{2+} / \text{TPrA}$                 | 603 | 603 | 14 |
| $(\text{bpy})_2\text{Ru}(\text{AZA-bpy})^{2+} / \text{TPrA}$                 | 613 | 613 | 14 |
| $(\text{bpy})_2\text{Ru}(\text{CE-bpy})^{2+} / \text{TPrA}$                  |     | 650 | 15 |
| $(\text{bpy})_2\text{Ru}(\text{CE-bpy})^{2+} / \text{TPrA}$                  |     | 655 | 15 |
| $\text{Ru}(\text{v-bpy})_3^{2+}$                                             | 630 | 650 | 16 |
| $(\text{bpy})_2\text{Ru}(\text{DC-bpy})^{2+}$                                | 629 | 629 | 17 |
| $(\text{bpy})_2\text{Ru}(\text{DM-bpy})^{2+}$                                | 605 | 605 | 17 |
| $(\text{bpy})_2\text{Ru}(\text{dpen-bpy})^{2+} / \text{PF}_6^-$              | 612 | 612 | 18 |

|                                                        |      |      |    |
|--------------------------------------------------------|------|------|----|
| $\text{Ru(m-bpy)}_3^{2+} / \text{PF}_6^-$              | 609  | 612  | 18 |
| $\text{Ru(dtb-bpy)}_3^{2+} / \text{PF}_6^-$            | 610  | 611  | 18 |
| $(\text{bpy})_2\text{Ru(DIM)}^{2+}$                    | 600  | 600  | 19 |
| $(\text{bpy})_2\text{Ru(PBIm-H)}^{2+} / \text{PF}_6^-$ |      | 680  | 20 |
| $[\text{Ru(tpy)(tpy-COOEt)}] / \text{PF}_6^-$          | 706  | 706  | 21 |
| $\text{Ru(DM-bpy)}_3^{2+}$                             | 604  | 615  | 22 |
| $(\text{bpy})_2\text{Ru(dbeb)}^{2+} / \text{PF}_6^-$   | 642  | 640  | 23 |
| $(\text{bpy})_2\text{Ru(pbq)}^{2+}$                    | 900  | 900  | 24 |
| $(\text{PBIm-H})_2\text{Ru(pbq)}^{2+}$                 | 945  | 945  | 24 |
| $(\text{PBIm-H})_2\text{Ru(acac)}^{2+}$                | 850  | 880  | 24 |
| $[\text{Ru(PBIM-H)}_2]_2(\text{pbq})^{+2}$             | 1040 | 1040 | 24 |
| $\text{Ru(tpy)(trz)}^{2+} / \text{PF}_6^-$             | 723  | 717  | 25 |
| $\text{Ru(tpy-COOEt)(trz)}^{2+} / \text{PF}_6^-$       | 717  | 725  | 25 |
| $(\text{bpy})_2\text{Ru(Mt-bpy)}^{2+} / \text{PF}_6^-$ | 625  | 557  | 26 |
| RuTRu                                                  | 625  | 598  | 26 |
| $(\text{bpy})_2\text{Ru(aa-bpy)}^{2+} / \text{PF}_6^-$ | 649  | 699  | 27 |

|                                                                                         |     |     |    |
|-----------------------------------------------------------------------------------------|-----|-----|----|
| $\text{Ru}_2(\text{bpy})_4(\text{im-phen}) / \text{ClO}_4^-$                            | 638 | 655 | 28 |
| $(\text{bpy})_2\text{Ru}(\text{Eh-bpy})^{2+} / \text{PF}_6^-$                           | 427 | 600 | 29 |
| $(\text{bpy})_2\text{Ru}(\text{Hmh-bpy})^{2+} / \text{PF}_6^-$                          | 427 | 600 | 29 |
| $(\text{H}_2\text{MPy}_3,4\text{DMPP})\text{Ru}(\text{bpy})_2\text{Cl} / \text{PF}_6^-$ | 655 | 656 | 30 |
| $\text{Ru}_2(\text{bpy})_2(\text{tpy})_2(\text{BTB})^{2+}$                              | 680 | 710 | 31 |
| $\text{Ru}_2(\text{bpy})_2(\text{tpy})_2(4\text{-TBN})^{3+}$                            | 676 | 680 | 31 |
| $[\text{Ru}(\text{bpy})_2]_2(\text{bmpa-bpy})^{+2} / \text{PF}_6^-$                     | 642 | 596 | 32 |
| $[\text{Ru}(\text{bpy})_2]_2(\text{bmdpa-bpy})^{+2} / \text{PF}_6^-$                    | 638 | 570 | 32 |
| $[\text{Ru}(\text{bpy})_2]_2(\text{bmna-bpy})^{+2} / \text{PF}_6^-$                     | 636 | 570 | 32 |

**m-bpy** = 4-methyl-2,2'-bipyridine

**dtb-bpy** = 4,4'-di-tert-butyl-2,2'-bipyridine

**dpen-bpy** = 4,4'-di-n-pentyl-2,2'-bipyridine

**DIM** = 4,7-dimethyl-1,10-phenanthroline

**PBIIm-H** = 2-(2-pyridyl)-1H-benzoimidazole

**tpy** = 2,2',6',2''-terpyridine

**tpy-COOEt** = 2,2',6',2'', terpyridine-4'-carboxylic acid ethyl ester

**DM-bpy** = 4,4'-dimethyl-2,2'- bipyridine

**dbeb** = 4,4'-dibutyl ester-2,2'-bipyridine

**pbq** = 2,3-bis(2-pyridyl)benzoquinoline

**acac** = acetylacetone

**trz** = 2-phenyl-4,6-dipyridin-2-yl-1,3,5-triazine

**RuTRu** = bis-2,2'-bipyridyl-ruthenium-bis-[2-((E)-4'-methyl-2,2'-bipyridinyl-4)-ethenyl]-thienyl-bis-2,2'-bipyridyl-ruthenium tetra hexafluorophosphate

**Mt-bpy** = 4-methyl-4'-(2-thienylethenyl)-2,2'-bipyridine

**aa-bpy**= Acrylic acid 4'-acryloyloxymethyl-2,2'-bipyridinyl-4-ylmethyl ester  
**im-phen** =1,2-bis(4-(1H-imidazo[4,5-f][1,10]phenanthroline-2-yl)phenoxy)ethane  
**Eh-bpy** =4,4'-bis(3-ethylheptyl)-2,2'-bipyridine  
**Hmh-bpy** =4-dihexylmethyl-4'-heptyl-2,2'-bipyridine  
**H2MPy3,4DMPP** = meso-tris-3,4-dimethoxyphenyl-mono-(4-pyridyl)porphyrin  
**4-TBN** = 4-(1H-tetrazol-5-yl)benzotrile  
**BTB** = bis(1H-tetrazol-5-yl)benzene  
**bpy** = 2,2'-bipyridine  
**C<sub>2</sub> O<sub>4</sub><sup>2-</sup>** = oxalate ion  
**S<sub>2</sub> O<sub>8</sub><sup>2-</sup>** = persulfate or peroxydisulfate  
**TPrA** = tri-n-propylamine  
**dmbp** = 4,4'-Me<sub>2</sub>bpy and DM-bpy = 4,4'-dimethyl-2,2'-bipyridine  
**phen** = 1,10-phenanthroline  
**terpy** = 2,2',2''-terpyridine  
**bpz** =2,2'-bipyrazine  
**dp-bpy** = 4,4'-biphenyl-2,2'-bipyridyl  
**dp-phen** =4,7-diphenyl-1,10-phenanthroline  
**dmphen** = 4,7-dimethyl-1,10-phenanthroline  
**bphb** = 1,4-bis(4'-methyl-2,2'-bipyridin-4-yl)benzene  
**AZA-bpy** = 4-(N-aza-18-crown-6-methyl-2,2'-bipyridine  
**CE-bpy**= bipyridine ligand where a crown ether (15-crown 5) is bound to the bpy ligand in the 3- and 3'-positions  
**v-bpy** =4-vinyl-4'-methyl-2,2'-bipyridine  
**DC-bpy** = 4,4'-dicarboxy-2,2'-bipyridine  
**PF<sub>6</sub><sup>-</sup>** =hexafluorophosphate  
**bmpa-bpy** =bis(4'-methyl-2,2'-bipyridinyl-4-carbonyl)-(1,4-phenylenediamine)  
**bmdpa-bpy** =bis(4'-methyl-2,2'-bipyridinyl-4-carbonyl)-(1,4-diphenylenediamine)  
**bmna-bpy** =bis(4'-methyl-2,2'-bipyridinyl-4-carbonyl)-(1,4-naphthalenediamine)

**S2.** Absorption and emission properties of Ru quinoxaline derivatives.

| <b>compound</b>                                              | <b>Absorption:</b><br>$\lambda_{\max}$ , nm(log $\epsilon$ ) | <b>Emission:</b><br>$\lambda_{\text{em}}$ , nm ( $\theta_{\text{em}}$ ) | <b>reference</b> |
|--------------------------------------------------------------|--------------------------------------------------------------|-------------------------------------------------------------------------|------------------|
| [Ru(dpp) <sub>3</sub> ] <sup>2+</sup>                        | 455 (1.54)                                                   |                                                                         | 33               |
| [Ru(dpq) <sub>3</sub> ] <sup>2+</sup>                        | 500 (1.51)                                                   | 716                                                                     | 33               |
| [Ru(phen) <sub>2</sub> (dpp)] <sup>2+</sup>                  | 465 (1.06)                                                   | 652                                                                     | 33               |
| [Ru(bpy) <sub>2</sub> (dpp)] <sup>2+</sup>                   | 464 (1.15)                                                   | 660                                                                     | 33               |
| [Ru(phen) <sub>2</sub> (dpq)] <sup>2+</sup>                  | 516 (1.10)                                                   | 756                                                                     | 33               |
| [Ru(bpy) <sub>2</sub> (dpq)] <sup>2+</sup>                   | 517 (0.84)                                                   | 760                                                                     | 33               |
| [Ru(bpy) <sub>2</sub> (tpphz)] <sup>2+</sup>                 | 449 (1.72)                                                   | 628 (0.100)                                                             | 34               |
| [Ru(bpy) <sub>2</sub> (dppx)] <sup>2+</sup>                  | 446 (2.27)                                                   | 623 (0.088)                                                             | 34               |
| [Ru(bpy) <sub>2</sub> (dppm2)] <sup>2+</sup>                 | 447 (2.28)                                                   | 630 (0.090)                                                             | 34               |
| [Ru(bpy) <sub>2</sub> (dppp2)] <sup>2+</sup>                 | 441 (2.28)                                                   | 745 (<0.005)                                                            | 34               |
| [Ru(bpy) <sub>2</sub> (dppz)] <sup>2+</sup>                  | 445 (1.63)                                                   | 631 (0.083)                                                             | 35               |
| [Ru(bpy) <sub>2</sub> (dpqp)] <sup>2+</sup>                  | 457                                                          | 618 (0.76)                                                              | 35               |
| [Ru(phen) <sub>2</sub> (dicnq)] <sup>2+</sup>                | 445 (4.33)                                                   | 613 (0.012)                                                             | 36               |
| [Ru(phen)(dicnq)] <sup>2+</sup>                              | 441 (4.31)                                                   | 610 (0.004)                                                             | 36               |
| [Ru(bpy) <sub>2</sub> (dicnq)] <sup>2+</sup>                 | 439 (1.75)                                                   | 640 (0.0055)                                                            | 37               |
| [Ru(bpy) <sub>2</sub> (dppzc)] <sup>2+</sup>                 | 448 (1.95)                                                   | 630 (0.009)                                                             | 37               |
| [Ru(bpy)(dppzc) <sub>2</sub> ] <sup>2+</sup>                 | 431 (2.51)                                                   |                                                                         | 37               |
| [Ru(phen) <sub>2</sub> (dppzc)] <sup>2+</sup>                | 431 (2.43)                                                   |                                                                         | 37               |
| [Ru(bpy) <sub>2</sub> (dpqOHCOOH)] <sup>2+</sup>             | 455 (1.78)                                                   | 620 (0.068)                                                             | 37               |
| [Ru(bpy) <sub>2</sub> (dpq(OH) <sub>2</sub> )] <sup>2+</sup> | 453 (1.56)                                                   | 627 (0.087)                                                             | 37               |
| [Ru(phen) <sub>2</sub> (dppz)] <sup>2+</sup>                 | 439(2.23)                                                    | 618                                                                     | 38               |
| [Ru(phen) <sub>2</sub> (dppx)] <sup>2+</sup>                 | 440(2.1)                                                     | 610                                                                     | 38               |
| [Ru(phen) <sub>2</sub> (dppm2)] <sup>2+</sup>                | 441(2.25)                                                    | 615                                                                     | 38               |
| [Ru(phen) <sub>2</sub> (dppa)] <sup>2+</sup>                 | 438(2.34)                                                    | 612                                                                     | 38               |
| [Ru(phen) <sub>2</sub> (dppb)] <sup>2+</sup>                 | 439(2.14)                                                    | 660                                                                     | 38               |
| [Ru(phen) <sub>2</sub> (dppp2)] <sup>2+</sup>                | 439(2.12)                                                    | 620                                                                     | 38               |
| [Ru(phen) <sub>2</sub> (dppp3)] <sup>2+</sup>                | 439(2.11)                                                    | 616                                                                     | 38               |
| [Ru(phen) <sub>2</sub> (dppn)] <sup>2+</sup>                 | 443(2.56)                                                    | 606                                                                     | 38               |

- Dpp** 2,3-bis(2'-pyridyl)pyrazine)  
**dpq** Dipyrido[3,2-*f*:2',3-*h*]quinoxaline  
**tpphz** Tetrapyrdo[3,2-*a*:2',3'-*c*:3'',2''-*h*:2,3'''-*j*]phenazine  
**dppx** 11,12-Dimethyl-dipyrido[3,2-*a*:2',3'-*c*]phenazine  
**dppm** 10-Dimethyl-dipyrido[3,2-*a*:2',3'-*c*]phenazine  
**dppp** Pyrido[2',3':5,6]pyrazino[2,3-*f*][1,10]phenanthroline  
**dppz** Dipyrido[3,2-*a*:2',3'-*c*]phenazine  
**dpqp** Dipyrido[2,3-*a*:3',2'-*c*]quinolino[3,2-*j*]phenazine  
**dicnq** 6,7-dicyanodipyrido[2,2-*d*:2',3'-*f*]quinoxaline  
**dppzc** dipyrido[3,2-*a*:2',3'-*c*]phenazine-2-carboxylic acid  
**dppn** 4,5,9,16-Tetraaza-dibenzo[*a,c*]naphthacene

**S3.**

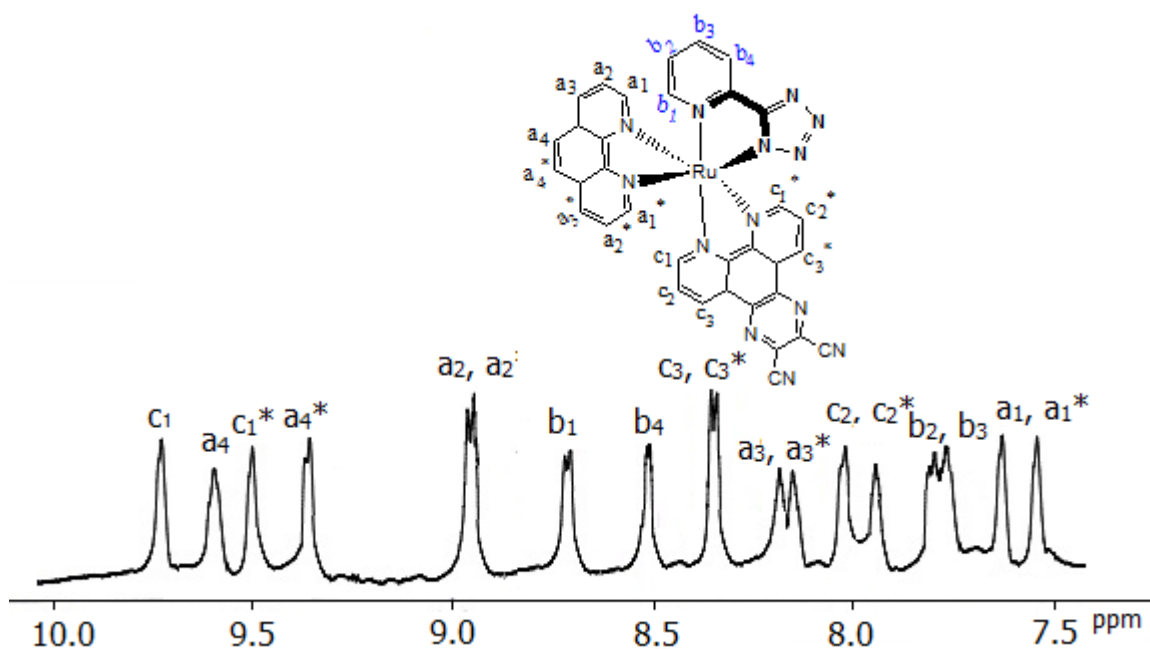



Figure S3a.  $^1\text{H-NMR}$  spectrum of aromatic region of  $[\text{Ru}(\text{dicnq})(\text{pyTz})(\text{phen})]\text{BF}_4$  dissolved in DMSO solvent at room temperature.

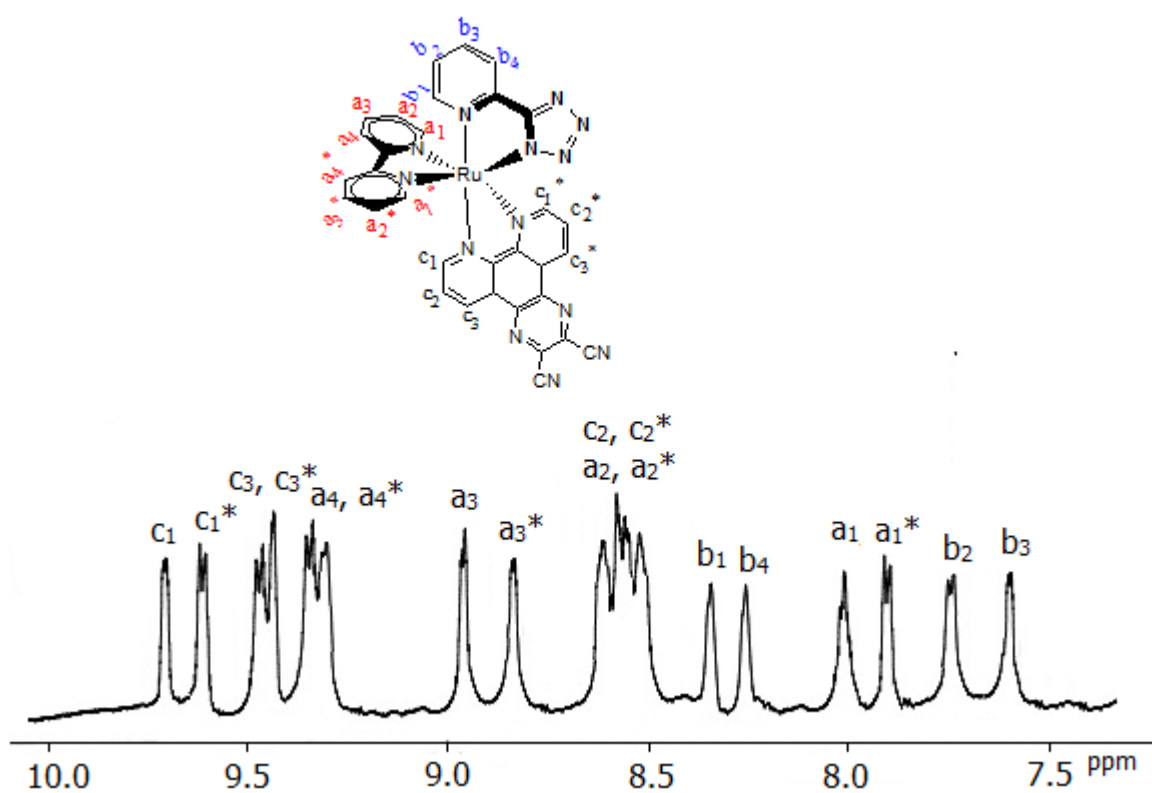

Figure S3b.  $^1\text{H-NMR}$  spectrum of aromatic region of  $[\text{Ru}(\text{dicnq})(\text{pyTz})(\text{bpy})]\text{BF}_4$  dissolved in DMSO solvent at room temperature.

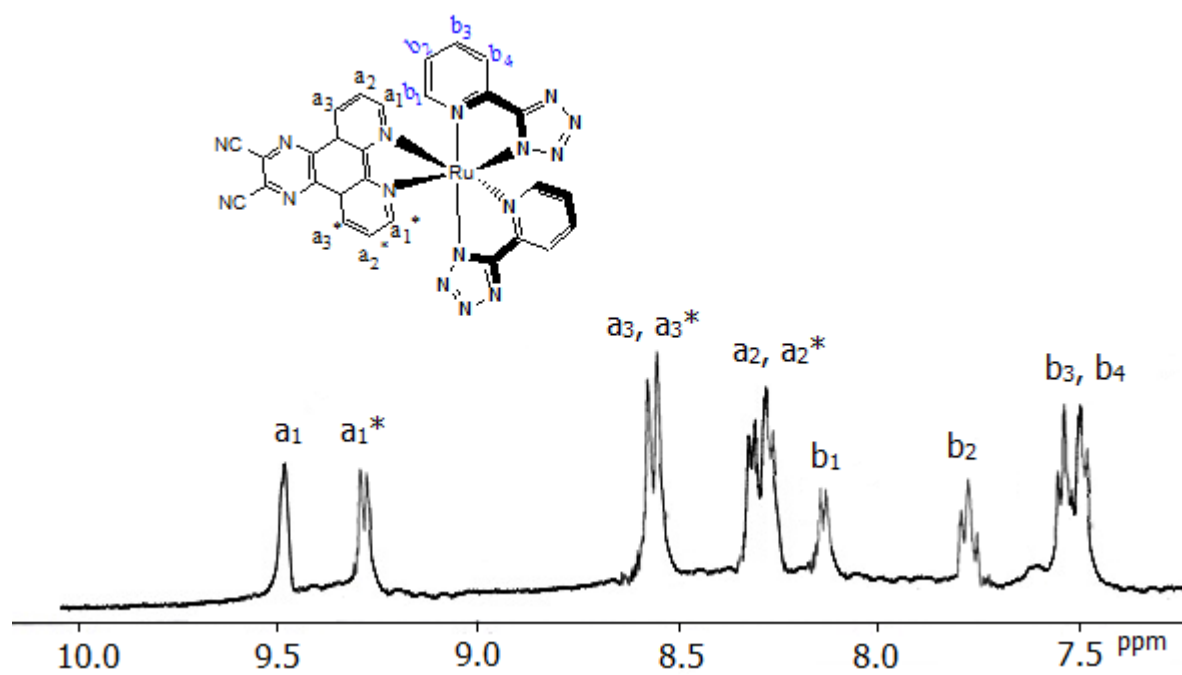

Figure S3c. <sup>1</sup>H-NMR spectrum of aromatic region of [Ru(dicnq)(pyTz)<sub>2</sub>] dissolved in DMSO solvent at room temperature.

S4.

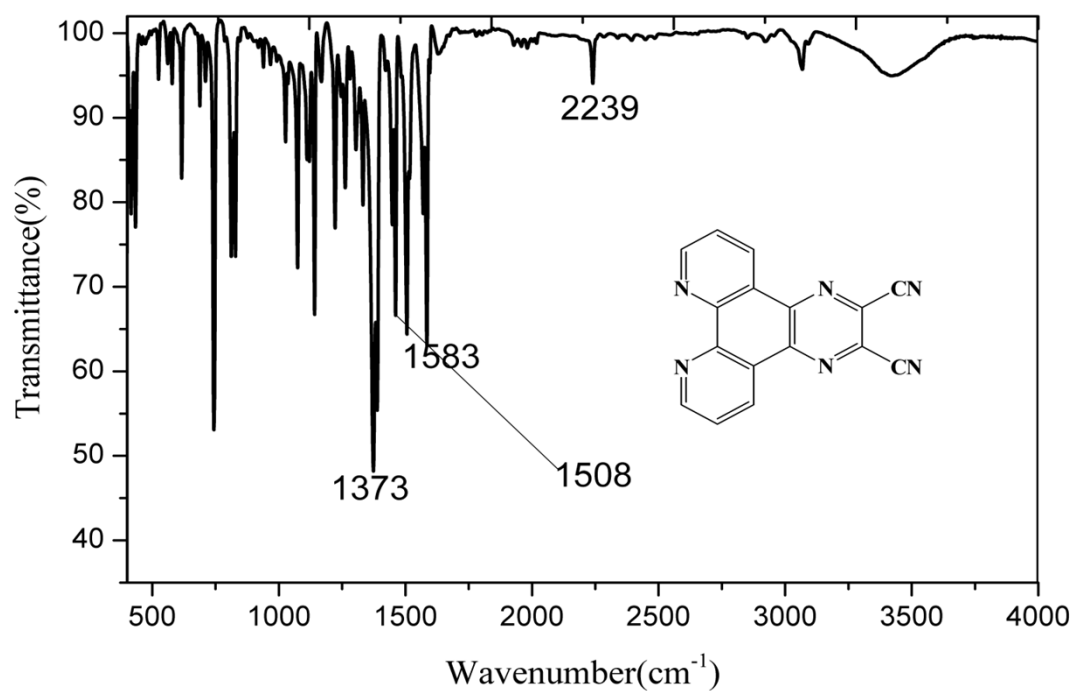

Figure S4a. FTIR spectrum of dicnq ligand with KBr disc.

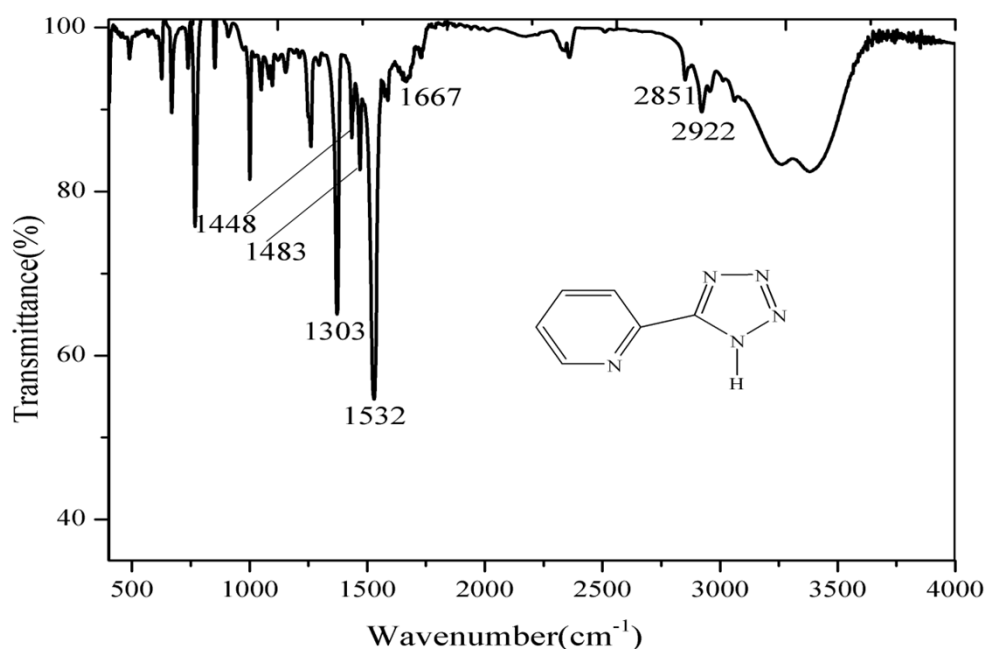

Figure S4b. FTIR spectrum of pyTz ligand with KBr disc.

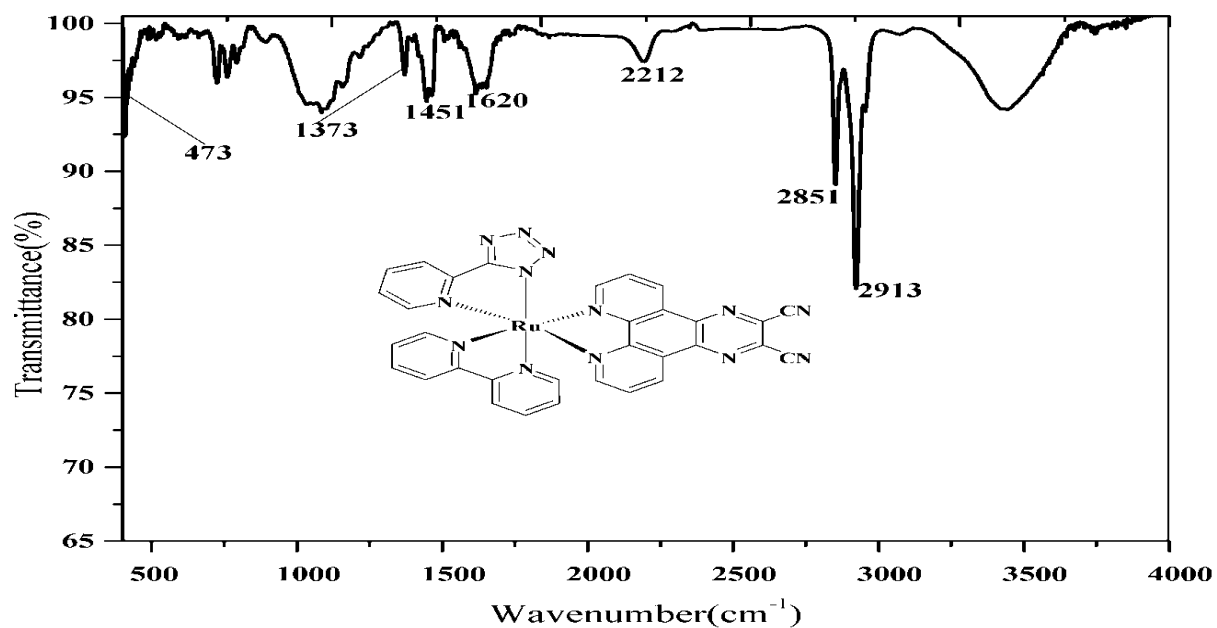

Figure S4c. FTIR spectrum of  $[\text{Ru}(\text{dicnq})(\text{pyTz})(\text{bpy})]\text{BF}_4$  with KBr disc.

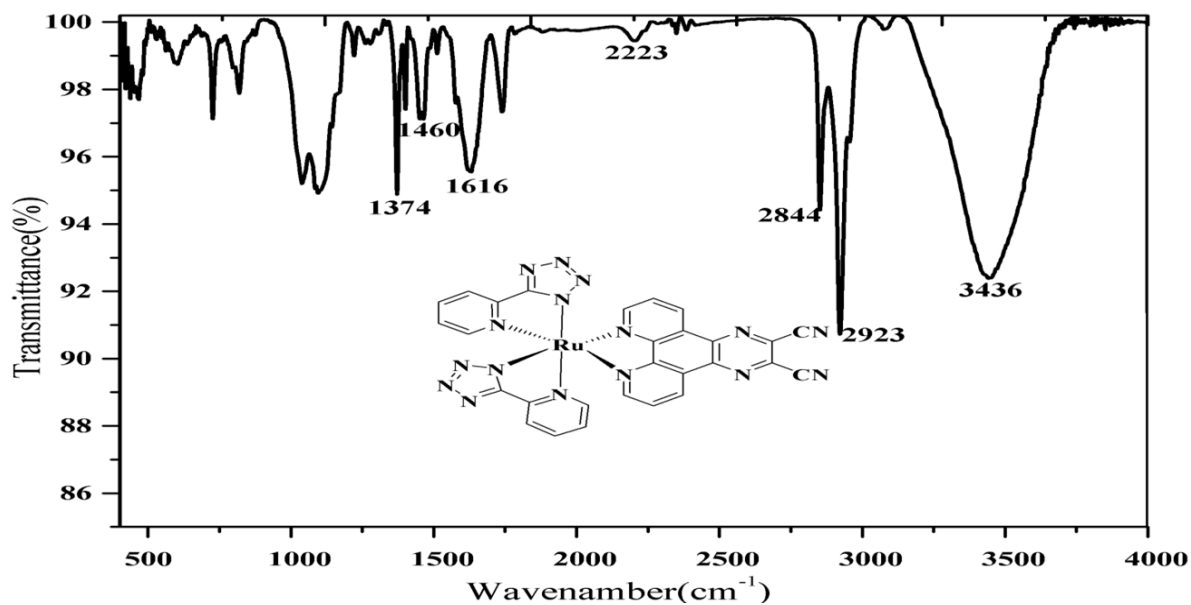

Figure S4d. FTIR spectrum of  $[\text{Ru}(\text{dicnq})(\text{pyTz})_2]$  with KBr disc.

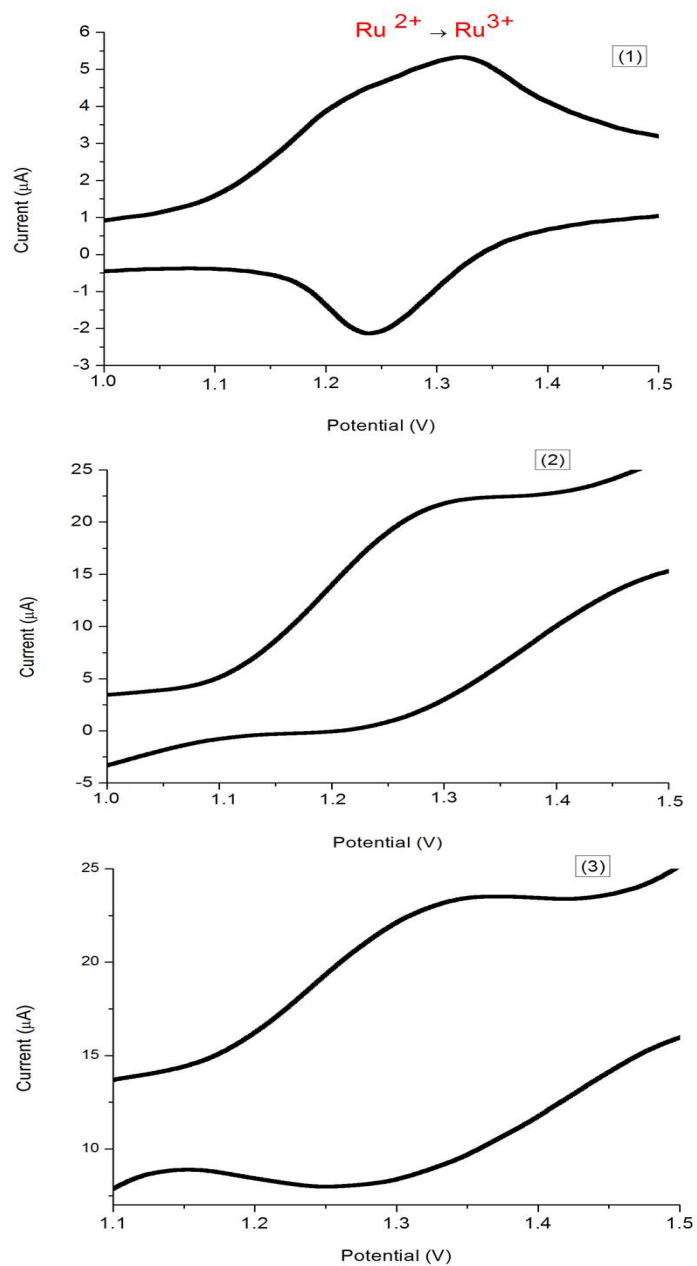

Figure S5. Cyclic voltammograms of Ru(dicnq) complexes (1-3) in MeCN solution containing 0.1 M tetra-n-butyl ammonium tetrafluoroborate at room temperature.

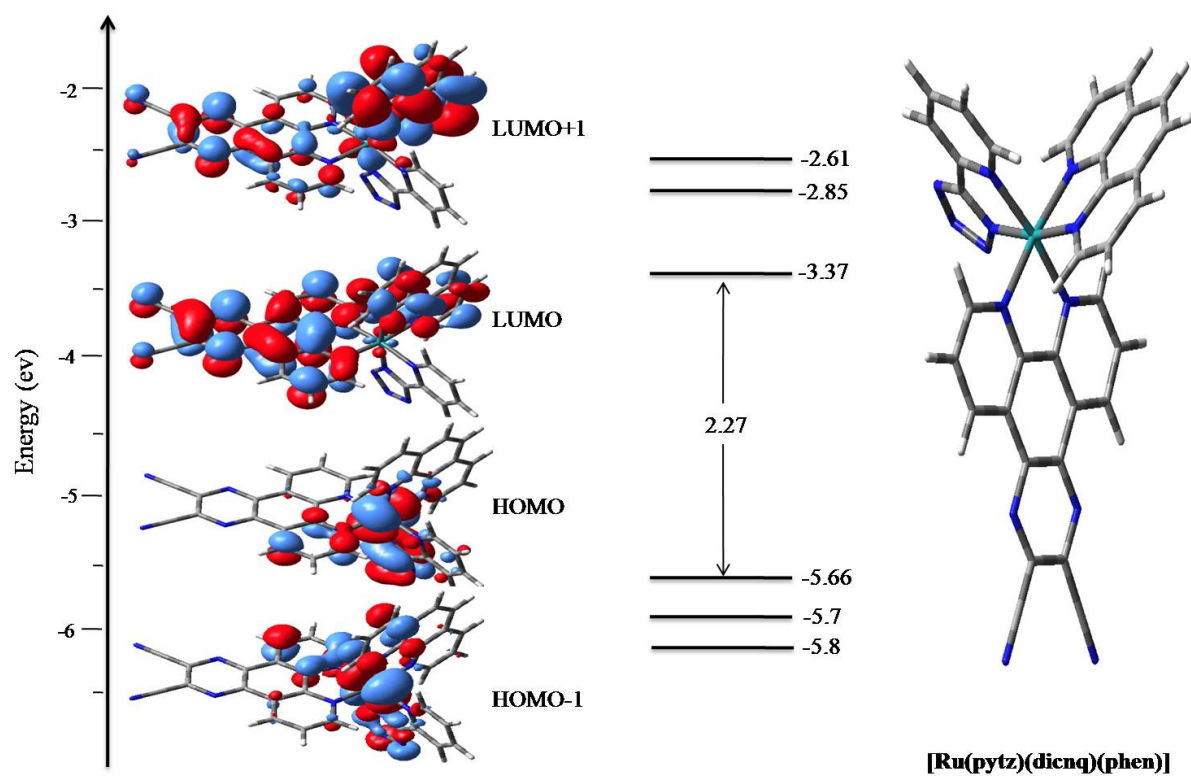

Figure S6a. Left: the optimized structures of [Ru(dicnq)(pyTz)(phen)]BF<sub>4</sub>. Right: Diagram of the three highest occupied and three lowest unoccupied molecular orbital levels of [Ru(dicnq)(pyTz)(phen)]BF<sub>4</sub> by DFT calculation .

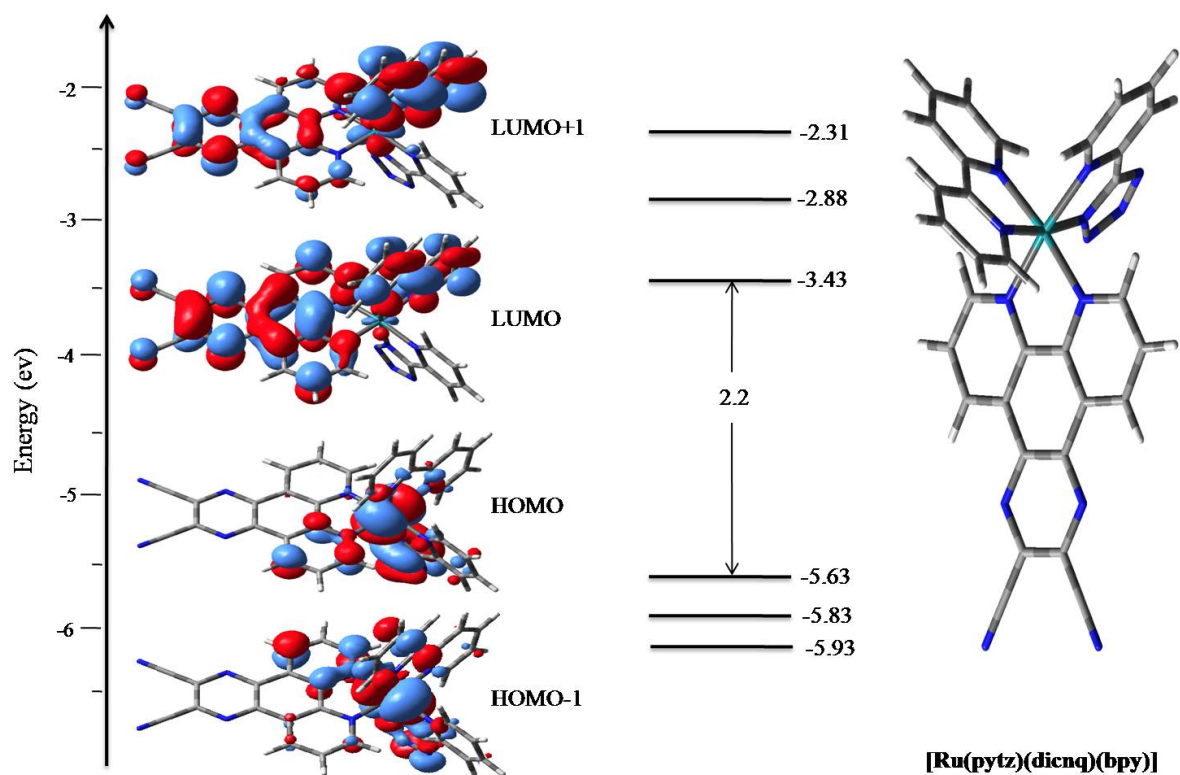

Figure S6b. Left: the optimized structures of  $[\text{Ru}(\text{dicnq})(\text{pyTz})(\text{bpy})]\text{BF}_4$ . Right: Diagram of the three highest occupied and three lowest unoccupied molecular orbital levels of  $[\text{Ru}(\text{dicnq})(\text{pyTz})(\text{bpy})]\text{BF}_4$  DFT calculation .

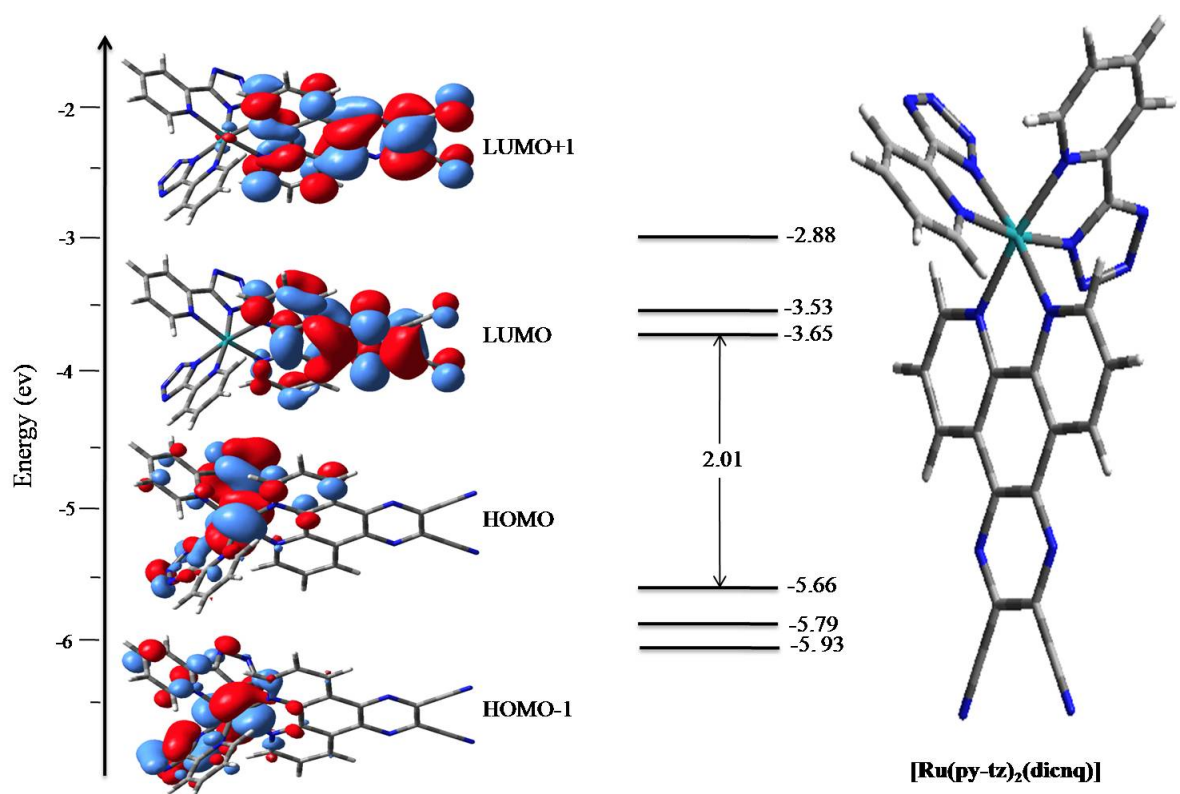

Figure S6c. Left: the optimized structures of [Ru(dicnq)(pyTz)<sub>2</sub>]. Right: Diagram of the three highest occupied and three lowest unoccupied molecular orbital levels of [Ru(dicnq)(pyTz)<sub>2</sub>] by DFT calculation .

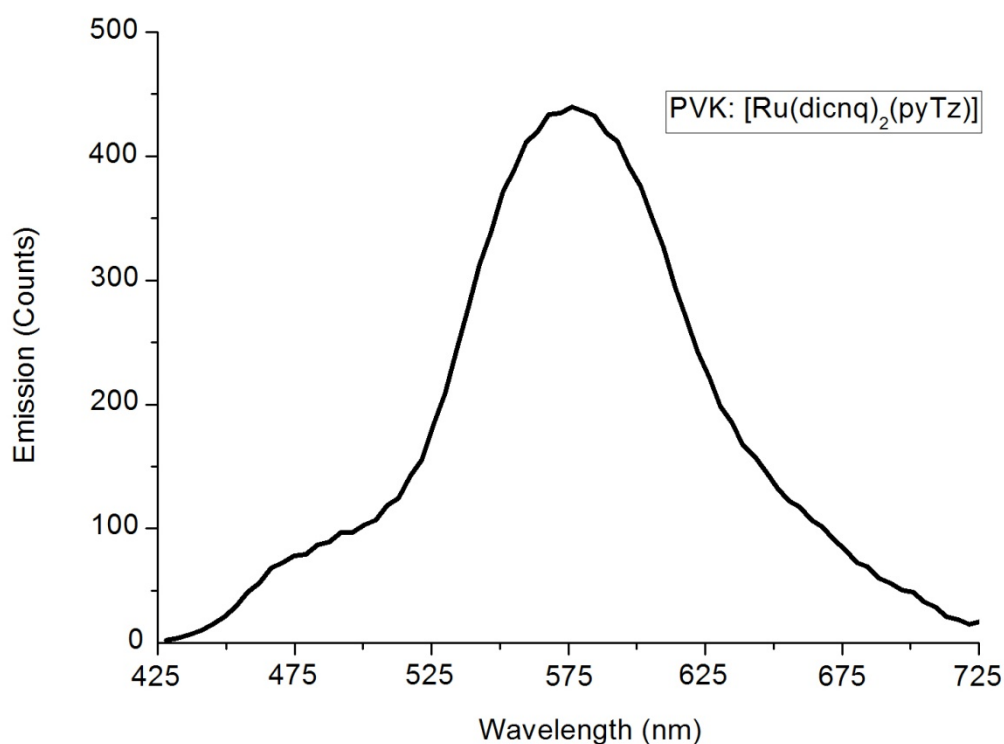

Figure S7. PL spectrum of PVK/Ru(dicnq) film ( $\lambda_{\text{exc}}=405$  nm).

## References:

- [1]. N. Tokel, A. J. Bard , *J. Am. Chem. Soc.* **1972**, *94*, 2862.
- [2].R. S. Glass, L. R. Faulkner, *J. Phys. Chem.* **1981**, *85*, 1160.
- [3].W. L.Wallace, A. J. Bard, *J. Phys. Chem.* **1979**, *83*, 1350.
- [4].I. Rubinstein, A. J. Bard, *J. Am. Chem. Soc.* **1981**, *103*, 512.
- [5].F. Kanoufi, A. J. Bard, *J. Phys. Chem. B.* **1999**, *103*, 10469.
- [6].H. S. White, A. J. Bard, *J. Am. Chem. Soc.* **1981**, *104*, 6891.
- [7] J. K. Leland, M. J. Powell, *J. Electroanal. Chem.* **1991**, *318*, 91.
- [8]N. E. Tokel-Takvoryan, R. E. Hemingway, A. J. Bard, *J. Am.Chem. Soc.* **1973**, *95*, 6582.



- [9] J. Velasco, I. Rubinstein, R. J. Crutchley, A. B. P. Lever, A. Bard, *Inorg. Chem.* **1983**, *22*, 822
- [10] J. G. Velasco, *J. Phys. Chem.* **1988**, *92*, 2202.
- [11] S. Yamazaki-Nishida, Y. Harima, K. Yamashita, *J. Electroanal. Chem.* **1990**, *283*, 455.
- [12] J. Ouyang, A. J. Bard, *Chem. Soc. Jpn.* **1988**, *61*, 17.
- [13] M. M. Richter, A. J. Bard, W. Kim, R. S. Schmechl, *Anal. Chem.* **1998**, *70*, 310.
- [14] B. D. Muegge, M. M. Richter, *Anal. Chem.* **2002**, *74*, 547.
- [15] R. Y. Lai, M. Chiba, N. Kitamura, A. Bard, *Anal. Chem.* **2002**, *74*, 551
- [16] H. Abruna, A. J. Bard, *J. Am. Chem. Soc.* **1982**, *104*, 2641.
- [17] D. Bruce, J. McCall, Richter, M. M. *Analyst.* **2002**, *127*, 125.
- [18] S. Bernhard, J. Barron, P. Houston, H. Abruna, J. Ruglovksy, X. Gao, G. Malliaras, *J. Am. Chem. Soc.* **2002**, *124*, 13624.
- [19] J. Yang, K. Gordon, *Chem. Phys. Lett.* **2003**, *372*, 577.
- [20] Y. Chuai, D. N. Lee, C. Zhen, J. H. Min, B. H. Kimb, D. Zou, *Synth. Met.* **2004**, *145*, 259.
- [21] H. J. Bolink, L. Cappelli, E. Coronado, P. Gavina, *Inorg. Chem.* **2005**, *44*, 5966.
- [22] S. M. Chang, C. H. Fan, C. C. Lai, Y. C. Chao, S. C. Hu, *Surf. Coat. Technol.* **2006**, *200*, 3289.
- [23] H. Xia, Y. Zhu, D. Lu, M. Li, C. Zhang, B. Yang, Y. Ma, *J. Phys. Chem. B.* **2006**, *110*, 18718.
- [24] S. Xun, J. Zhang, X. Li, D. Ma, Z. Y. Wang, *Synth. Met.* **2008**, *158*, 484
- [25] H. J. Bolink, E. Coronado, R. D. Costa, P. Gavina, E. Ortí, S. Tatay, *Inorg. Chem.* **2009**, *48*, 3907.
- [26] M. Li, J. Liu, L. Sun, J. Pan, C. Zhao, *J. Organomet. Chem.* **2008**, *693*, 46.
- [27] E. Puodziukynaite, J. L. Oberst, A. L. Dyer, J. R. Reynolds, *J. Am. Chem. Soc.* **2012**, *134*, 968.
- [28] C. Ju, C. H. Chen, C. L. Yuan, K. Z. Wang, *Thin Solid Films.* **2011**, *519*, 3883.
- [29] I. Oner, C. Sahin, C. Varlikli, *Dyes Pig.*, **2012**, *95*, 23.
- [30] R. Pyati, M. Richter, *Annu. Rep. Prog. Chem., Sect. C*, **2007**, *103*, 12.
- [31] S. Stagni, A. Palazzi, S. Zacchini, B. Ballarin, C. Bruno, M. Marcaccio, F. Paolucci, M. Monari, M. Carano, A. J. Bard, *Inorg. Chem.* **2006**, *45*, 695.
- [32] M. Li, J. Liu, C. Zhao, L. Sun, *J. Organomet. Chem.* **2006**, *691*, 4189.
- [33] A. W. Wallace, W. R. Murphy, J. D. Petersen, *Inorg. Chim. Acta.* **1989**, *166*, 41.
- [34] Y. Sun, D. A. Lutterman, C. Turro, *Inorg. Chem.* **2008**, *47*, 6427.
- [35] Y. Sun, S. N. Collins, L. E. Joyce, C. Turro, *Inorg. Chem.* **2010**, *49*, 4257.
- [36] A. Ambroise, B. G. Maiya, *Inorg. Chem.* **2000**, *39*, 4264.
- [37] B. Gholamkhash, K. Koike, N. Negishi, H. Hori, K. Takeuchi, *Inorg. Chem.* **2001**, *40*, 756.
- [38] R. M. Hartshorn, J. K. Barton, *J. Am. Chem. Soc.*, **1992**, *114*, 5919. 19.
